# Supplementary material for: A DNA barcode library for the water mites of Montenegro
Source: Biodivers Data J. 2021 Dec 20;9:e78311. doi: 10.3897/BDJ.9.e78311 (PMC8712502; doi:10.3897/BDJ.9.e78311)
Supplement: Supplementary material 1 — Molecular distances [file bdj-09-e78311-s001.xlsx]

## Sheet: MatrixOutput
	Arrenurus_cylindratus	Arrenurus_refractariolus	Atractides_anae	Atractides_fissus	Atractides_fluviatilis	Atractides_fonticolus	Atractides_gibberipalpis_BIN:AEK7766	Atractides_inflatipalpis	Atractides_inflatipes	Atractides_inflatus	Atractides_latipes	Atractides_nodipalpis_BIN:ACR0209	Atractides_nodipalpis_BIN:AED3547	Atractides_pennatus	Atractides_robustus	Atractides_stankovici	Atractides_gibberipalpis_BIN:AEI3946	Hexaxonopsis_serrata	Hydrodroma_reinhardi	Hydrodroma_torrenticola	Hygrobates_calliger_BIN:AEF4261	Hygrobates_calliger_BIN:AEL5782	Hygrobates_foreli	Hygrobates_lacrima	Hygrobates_limnocrenicus	Hygrobates_longipalpis	Hygrobates_mediterraneus	Hygrobates_norvegicus	Lebertia_cuneifera	Lebertia_glabra_BOLD:ACR9598	Lebertia_glabra_BIN:ACS0595	Lebertia_glabra_BIN:AEI925	Lebertia_inaequalis_BIN:AEF2742	Lebertia_inaequalis_BIN:AEF5913	Lebertia_insignis	Lebertia_jadrensis	Lebertia_maculosa_BIN:AED9718	Lebertia_maculosa_BIN:AED9197	Lebertia_natans	Lebertia_porosa_BIN:AED4662	Lebertia_porosa_BIN:ACS0974	Lebertia_reticulata	Lebertia_schechteli	Lebertia_variolata	Lebertia_inaequalis_BIN:ADF6223	Limnesia_undulata	Limnochares_aquatica	Mideopsis_milankovici	Mideopsis_roztoczensis
Arrenurus_cylindratus
Arrenurus_refractariolus	0.21338
Atractides_anae	0.494236	0.449705
Atractides_fissus	0.399631	0.405434	0.243713
Atractides_fluviatilis	0.422699	0.431319	0.278729	0.194123
Atractides_fonticolus	0.408865	0.394916	0.242558	0.207843	0.241958
Atractides_gibberipalpis_BIN:AEK7766	0.411638	0.4015	0.326297	0.324056	0.36218	0.351696
Atractides_inflatipalpis	0.42917	0.387745	0.277332	0.232619	0.24127	0.251639	0.364502
Atractides_inflatipes	0.454478	0.416631	0.295516	0.316446	0.326181	0.320616	0.271455	0.359614
Atractides_inflatus	0.484992	0.409569	0.345419	0.329223	0.346061	0.330111	0.201116	0.361615	0.281836
Atractides_latipes	0.441325	0.427585	0.31136	0.304752	0.334063	0.316194	0.283448	0.331483	0.180091	0.305162
Atractides_nodipalpis_BIN:ACR0209	0.443483	0.390267	0.304225	0.29951	0.274215	0.333458	0.213315	0.333995	0.275513	0.215288	0.267661
Atractides_nodipalpis_BIN:AED3547	0.434146	0.406791	0.325416	0.312329	0.319093	0.319723	0.217514	0.347125	0.267285	0.211152	0.281173	0.187697
Atractides_pennatus	0.508129	0.453357	0.0655219	0.254052	0.264119	0.267161	0.327413	0.286625	0.281943	0.358094	0.297117	0.319842	0.336917
Atractides_robustus	0.444604	0.418154	0.329479	0.311598	0.333292	0.29453	0.193338	0.349485	0.24199	0.221144	0.244709	0.154657	0.189581	0.348608
Atractides_stankovici	0.387711	0.385829	0.287698	0.232146	0.214567	0.215152	0.307735	0.247295	0.299661	0.339132	0.306305	0.270314	0.301331	0.294718	0.289574
Atractides_gibberipalpis_BIN:AEI3946	0.41511	0.424889	0.310354	0.31119	0.352063	0.344729	0.0495529	0.361148	0.280057	0.205446	0.270561	0.202311	0.214553	0.316707	0.195233	0.323174
Hexaxonopsis_serrata	0.284076	0.238983	0.457575	0.390368	0.414726	0.430671	0.419808	0.424414	0.415092	0.408354	0.391704	0.396629	0.416327	0.464546	0.394318	0.387039	0.420417
Hydrodroma_reinhardi	0.297923	0.276057	0.473381	0.433119	0.419691	0.448566	0.433221	0.440132	0.415385	0.455065	0.436719	0.387743	0.413611	0.453549	0.435971	0.409961	0.439876	0.262719
Hydrodroma_torrenticola	0.288892	0.288068	0.434091	0.440357	0.416579	0.394871	0.451241	0.435441	0.417724	0.469229	0.459125	0.411518	0.399868	0.46754	0.385907	0.401936	0.448192	0.278337	0.19344
Hygrobates_calliger_BIN:AEF4261	0.342279	0.308727	0.51726	0.441171	0.461535	0.490829	0.504817	0.505875	0.468954	0.480095	0.468973	0.480298	0.462577	0.549285	0.491531	0.463648	0.515766	0.275753	0.340628	0.284664
Hygrobates_calliger_BIN:AEL5782	0.300594	0.283242	0.49419	0.46634	0.446121	0.506229	0.469742	0.494145	0.473716	0.519904	0.491424	0.48011	0.447146	0.507777	0.484782	0.438553	0.496805	0.258326	0.31304	0.270877	0.209305
Hygrobates_foreli	0.32454	0.29056	0.473931	0.452737	0.468435	0.469428	0.477189	0.457185	0.447892	0.507676	0.450614	0.479585	0.463548	0.477342	0.448603	0.407376	0.482176	0.287239	0.302191	0.306854	0.251136	0.194181
Hygrobates_lacrima	0.301998	0.300155	0.454789	0.422752	0.427484	0.460031	0.402933	0.485662	0.412989	0.444615	0.459528	0.412137	0.390466	0.491205	0.428325	0.391141	0.426747	0.249901	0.268088	0.269484	0.249798	0.227523	0.232947
Hygrobates_limnocrenicus	0.296947	0.266482	0.451353	0.410509	0.419425	0.455934	0.443631	0.440132	0.408612	0.426691	0.414722	0.419583	0.390944	0.484194	0.440184	0.398665	0.440535	0.240926	0.26699	0.249476	0.231252	0.21432	0.229749	0.132189
Hygrobates_longipalpis	0.316659	0.300807	0.450428	0.415357	0.433597	0.457324	0.442138	0.450979	0.444361	0.422297	0.466775	0.422517	0.456151	0.47083	0.434202	0.42383	0.464849	0.255128	0.303539	0.298224	0.272729	0.242223	0.249605	0.212893	0.200087
Hygrobates_mediterraneus	0.365823	0.31311	0.476557	0.469041	0.489844	0.499403	0.428301	0.461473	0.421079	0.440311	0.421012	0.428528	0.451443	0.507316	0.41432	0.446142	0.446187	0.302038	0.326841	0.296042	0.291082	0.28628	0.288713	0.275216	0.259812	0.278585
Hygrobates_norvegicus	0.289853	0.281803	0.483848	0.455854	0.465334	0.463421	0.442587	0.499117	0.452976	0.460209	0.447686	0.454862	0.437944	0.518485	0.477846	0.431012	0.464113	0.259596	0.31181	0.278091	0.241142	0.218715	0.228947	0.236007	0.230739	0.240679	0.301402
Lebertia_cuneifera	0.27494	0.219688	0.459688	0.391751	0.382438	0.40874	0.385882	0.411232	0.400846	0.414808	0.439671	0.379394	0.391886	0.478923	0.398674	0.382267	0.40983	0.20165	0.248019	0.279734	0.307285	0.266583	0.271954	0.260038	0.252345	0.257934	0.279259	0.253525
Lebertia_glabra_BIN:ACR9598	0.308451	0.244656	0.434549	0.393669	0.420402	0.442878	0.41329	0.448155	0.427115	0.416226	0.429066	0.389964	0.411947	0.431666	0.410678	0.379019	0.440367	0.203799	0.27516	0.263536	0.321658	0.2567	0.297337	0.286141	0.269562	0.288659	0.318209	0.292213	0.184665
Lebertia_glabra_BIN:ACS0595	0.283447	0.240286	0.455244	0.376089	0.415999	0.409486	0.401058	0.421315	0.417785	0.399091	0.398961	0.384812	0.412159	0.4556	0.37378	0.373171	0.405354	0.18495	0.269866	0.247205	0.284646	0.25289	0.26964	0.275914	0.254065	0.295437	0.283643	0.251887	0.168196	0.145322
Lebertia_glabra_BIN:AEI925	0.321824	0.248658	0.420372	0.393626	0.422304	0.425177	0.393969	0.411404	0.427159	0.436533	0.392006	0.406759	0.403749	0.42936	0.408456	0.393672	0.409456	0.205765	0.273102	0.281618	0.292078	0.284365	0.280531	0.244045	0.240652	0.270529	0.296166	0.267122	0.180316	0.177078	0.14327
Lebertia_inaequalis_BIN:AEF2742	0.268754	0.224334	0.399916	0.394792	0.423369	0.408743	0.383206	0.44691	0.381583	0.379709	0.421787	0.402958	0.381029	0.416814	0.391002	0.356895	0.397663	0.190007	0.258526	0.259232	0.275944	0.267671	0.262542	0.266079	0.263472	0.279114	0.294136	0.277546	0.171172	0.19058	0.140844	0.168512
Lebertia_inaequalis_BIN:AEF5913	0.276013	0.247545	0.412787	0.382299	0.398691	0.420654	0.420243	0.452477	0.405763	0.428903	0.396803	0.377069	0.406783	0.440129	0.379914	0.371388	0.411314	0.200687	0.240274	0.249046	0.300978	0.299276	0.283373	0.26855	0.260884	0.280955	0.277184	0.262905	0.169107	0.209673	0.17702	0.16227	0.175078
Lebertia_insignis	0.288744	0.212354	0.448956	0.407436	0.456653	0.419978	0.413133	0.412828	0.38841	0.425195	0.429066	0.381863	0.411931	0.461397	0.385026	0.404895	0.428622	0.205277	0.2405	0.261025	0.294726	0.290934	0.282868	0.279238	0.247476	0.272576	0.29229	0.270884	0.185783	0.214213	0.173201	0.170581	0.173989	0.173504
Lebertia_jadrensis	0.270524	0.229083	0.400519	0.364577	0.400286	0.397648	0.425448	0.408609	0.381281	0.414974	0.403981	0.397677	0.406553	0.424931	0.391049	0.369646	0.443623	0.203486	0.257458	0.276158	0.289835	0.271944	0.251404	0.250514	0.239101	0.267146	0.313835	0.261714	0.148481	0.179664	0.156875	0.150029	0.143696	0.144665	0.17219
Lebertia_maculosa_BIN:AED9718	0.278014	0.242419	0.3989	0.397109	0.399453	0.39942	0.404401	0.418752	0.406659	0.444118	0.426474	0.406858	0.415799	0.436682	0.41183	0.377549	0.418894	0.221471	0.288995	0.267628	0.271245	0.261414	0.280784	0.246096	0.228378	0.266625	0.272473	0.275759	0.197248	0.183273	0.173889	0.144005	0.165342	0.160581	0.189468	0.15638
Lebertia_maculosa_BIN:AED9197	0.258031	0.22506	0.384751	0.389693	0.388228	0.406649	0.397108	0.40872	0.406396	0.44184	0.426617	0.384385	0.394661	0.419223	0.402353	0.375407	0.408988	0.202971	0.279323	0.259403	0.265975	0.252261	0.277398	0.24906	0.226801	0.25973	0.267673	0.27887	0.18803	0.182493	0.163863	0.138607	0.144956	0.15376	0.168713	0.150259	0.0309626
Lebertia_natans	0.261805	0.236583	0.399539	0.362533	0.397956	0.397843	0.359088	0.395474	0.414788	0.394557	0.408904	0.363292	0.376701	0.417006	0.363569	0.371456	0.368308	0.203646	0.246958	0.265248	0.308222	0.304322	0.30948	0.267099	0.265789	0.269424	0.295867	0.278406	0.160406	0.196461	0.182085	0.185878	0.145983	0.178862	0.195229	0.160906	0.189088	0.167242
Lebertia_porosa_BIN:AED4662	0.297765	0.214848	0.4184	0.372728	0.403764	0.408633	0.387539	0.405966	0.409837	0.403193	0.390561	0.367124	0.399596	0.428847	0.375659	0.371872	0.388834	0.183272	0.23679	0.271893	0.273146	0.286784	0.266087	0.268671	0.27198	0.275778	0.283086	0.260583	0.173635	0.176612	0.158569	0.147853	0.141739	0.152771	0.163097	0.172157	0.159616	0.1457	0.144387
Lebertia_porosa_BIN:ACS0974	0.296024	0.226506	0.423757	0.376929	0.407492	0.410391	0.381496	0.406122	0.40587	0.419444	0.402747	0.382615	0.396138	0.433622	0.377744	0.382224	0.382479	0.188033	0.253958	0.265923	0.289749	0.300138	0.285509	0.273459	0.26528	0.277225	0.278399	0.256729	0.173716	0.181476	0.144545	0.141649	0.137648	0.15822	0.153352	0.170311	0.160633	0.1507	0.131954	0.0546853
Lebertia_reticulata	0.284879	0.216988	0.421808	0.345986	0.415114	0.396758	0.38536	0.428977	0.432759	0.397157	0.442635	0.386137	0.404079	0.441366	0.382127	0.379142	0.40309	0.185377	0.253677	0.275093	0.308503	0.293582	0.27267	0.259972	0.26407	0.286893	0.314937	0.287403	0.171144	0.183945	0.147646	0.158972	0.139612	0.173978	0.164495	0.160698	0.175075	0.158435	0.151194	0.140357	0.139869
Lebertia_schechteli	0.292268	0.246986	0.422076	0.384466	0.38727	0.406014	0.426869	0.425101	0.425248	0.398161	0.423276	0.384703	0.402401	0.447621	0.41326	0.352769	0.423902	0.180747	0.271925	0.248012	0.289942	0.26539	0.272268	0.264604	0.258813	0.264612	0.275842	0.257812	0.159179	0.187757	0.154564	0.17451	0.166385	0.159099	0.197441	0.169712	0.176494	0.164741	0.173155	0.146409	0.150765	0.13687
Lebertia_variolata	0.266991	0.229433	0.400729	0.399471	0.421825	0.393463	0.380414	0.426626	0.391188	0.405983	0.400816	0.404745	0.402728	0.428816	0.392197	0.369957	0.398414	0.21237	0.262187	0.282925	0.296558	0.291273	0.268433	0.272529	0.254965	0.283436	0.296096	0.256201	0.181001	0.172284	0.140499	0.148443	0.148891	0.160625	0.162955	0.111135	0.162724	0.151871	0.162111	0.168855	0.156703	0.148852	0.16306
Lebertia_inaequalis_BIN:ADF6223	0.280337	0.254786	0.413233	0.390358	0.400974	0.419145	0.41969	0.452745	0.410789	0.430255	0.398332	0.383583	0.40827	0.440478	0.382141	0.373247	0.412322	0.210734	0.244406	0.257002	0.318197	0.29697	0.295549	0.268117	0.260522	0.280048	0.2828	0.2752	0.165379	0.207633	0.176487	0.16166	0.173193	0.0010929	0.179065	0.14667	0.163039	0.156223	0.183213	0.16051	0.162825	0.183655	0.15996	0.158157
Limnesia_undulata	0.311451	0.253811	0.401184	0.367032	0.396294	0.407983	0.447724	0.435035	0.394815	0.425664	0.450311	0.379179	0.412885	0.424591	0.426044	0.376953	0.450398	0.232828	0.294316	0.305109	0.325498	0.313304	0.310825	0.276786	0.264531	0.266913	0.341386	0.316829	0.238238	0.27161	0.233624	0.243808	0.247767	0.212053	0.242913	0.209012	0.250803	0.240437	0.238795	0.245065	0.258767	0.215972	0.224278	0.219416	0.224006
Limnochares_aquatica	0.347302	0.295896	0.504319	0.41463	0.448858	0.462292	0.444367	0.483078	0.449831	0.434273	0.444142	0.435305	0.412899	0.515818	0.463757	0.41109	0.453627	0.285774	0.371104	0.355914	0.316091	0.309216	0.337113	0.296874	0.277243	0.286537	0.331853	0.302665	0.266111	0.297394	0.262813	0.245346	0.296524	0.301847	0.271121	0.282553	0.265655	0.251922	0.293707	0.264034	0.269052	0.256331	0.258176	0.273491	0.299374	0.319605
Mideopsis_milankovici	0.295862	0.261454	0.423678	0.390675	0.421339	0.425231	0.462086	0.432224	0.441331	0.434273	0.428302	0.415392	0.408659	0.461509	0.439701	0.4007	0.471764	0.249073	0.240466	0.253008	0.305879	0.264935	0.290089	0.268129	0.258443	0.301122	0.303994	0.239863	0.230777	0.245661	0.229038	0.214984	0.240785	0.234308	0.236994	0.213727	0.244754	0.228951	0.231042	0.203642	0.209787	0.233538	0.230775	0.24135	0.235685	0.280913	0.302357
Mideopsis_roztoczensis	0.256469	0.227601	0.441943	0.39468	0.464934	0.384344	0.462522	0.417919	0.435921	0.478164	0.410213	0.429524	0.451644	0.461047	0.416826	0.396134	0.437516	0.263506	0.243167	0.248927	0.307235	0.284968	0.275794	0.325075	0.270035	0.302779	0.337371	0.291737	0.269345	0.248598	0.237665	0.256761	0.256685	0.259205	0.241625	0.256014	0.282343	0.279811	0.284425	0.25907	0.264646	0.261817	0.244795	0.247056	0.254642	0.284971	0.342922	0.238616
Monatractides_madritensis_BIN:AED3803	0.266108	0.245465	0.413446	0.399867	0.425708	0.394952	0.426272	0.400586	0.403547	0.450278	0.433247	0.404395	0.390078	0.433987	0.391804	0.355723	0.422793	0.25012	0.241557	0.231019	0.316713	0.263317	0.294111	0.288466	0.250387	0.307442	0.315441	0.330334	0.222529	0.213566	0.2089	0.197301	0.194079	0.209906	0.211776	0.212032	0.225483	0.213026	0.206473	0.204834	0.209098	0.2283	0.220045	0.20982	0.211295	0.281638	0.302655	0.245352	0.245596
Monatractides_madritensis_BIN:AEL3852	0.268691	0.247863	0.408413	0.389262	0.413501	0.394916	0.416508	0.39548	0.397811	0.454968	0.437839	0.396337	0.390571	0.427011	0.38761	0.349641	0.412401	0.2458	0.241843	0.232522	0.321636	0.267066	0.300562	0.281731	0.252878	0.303279	0.313839	0.317918	0.220013	0.202277	0.210028	0.190787	0.199412	0.197561	0.203262	0.216174	0.220522	0.208034	0.201804	0.196589	0.198583	0.224712	0.213028	0.212933	0.201513	0.282457	0.303629	0.24454	0.249259
Monatractides_stadleri	0.275006	0.234627	0.428222	0.371244	0.429285	0.420275	0.407525	0.40454	0.384006	0.407615	0.431222	0.412465	0.400484	0.445916	0.393393	0.379521	0.413913	0.2133	0.244111	0.257563	0.303395	0.300724	0.290077	0.276047	0.278132	0.301664	0.321807	0.276268	0.182722	0.188056	0.202756	0.204599	0.173992	0.201733	0.186316	0.181157	0.220174	0.203243	0.185849	0.171236	0.175587	0.191224	0.193541	0.174947	0.20135	0.260331	0.279602	0.222261	0.227037
Mundamella_germanica	0.237489	0.210677	0.489411	0.437426	0.460071	0.414682	0.425535	0.46318	0.420142	0.502564	0.39486	0.404617	0.448239	0.500621	0.408486	0.371351	0.425535	0.253638	0.273292	0.25492	0.340896	0.307874	0.308729	0.292798	0.281723	0.286387	0.31445	0.25722	0.246242	0.271606	0.221349	0.271737	0.240017	0.22644	0.262159	0.256031	0.243241	0.231944	0.25775	0.236114	0.246007	0.270836	0.259596	0.239082	0.226616	0.284613	0.340888	0.268506	0.232931
Neumania_imitata	0.314726	0.315297	0.479299	0.440168	0.458026	0.500511	0.474939	0.447476	0.480027	0.474262	0.544195	0.448609	0.441897	0.495663	0.491894	0.416553	0.500586	0.252338	0.261532	0.271662	0.292205	0.247286	0.278078	0.253727	0.27766	0.274098	0.299621	0.299135	0.239711	0.281256	0.26744	0.256006	0.242726	0.24987	0.29197	0.244914	0.252413	0.234376	0.263004	0.260414	0.283252	0.252596	0.243497	0.269425	0.247661	0.280202	0.319818	0.230266	0.30194
Neumania_limosa	0.340984	0.302861	0.479194	0.43423	0.463178	0.447248	0.469264	0.47242	0.465421	0.479199	0.427039	0.473383	0.438373	0.496616	0.460679	0.414282	0.47718	0.23803	0.295368	0.299642	0.299799	0.295447	0.28935	0.261973	0.251607	0.315102	0.324753	0.277775	0.275837	0.296513	0.26348	0.281278	0.246882	0.27018	0.270532	0.2512	0.273481	0.274763	0.266196	0.24839	0.249411	0.260623	0.252552	0.263139	0.277051	0.296824	0.308851	0.280326	0.30674
Oxus_angustipositus	0.253858	0.233075	0.463434	0.39511	0.410724	0.445714	0.428514	0.443401	0.438636	0.461392	0.446147	0.42051	0.400029	0.492663	0.465298	0.373491	0.415642	0.252996	0.28053	0.270838	0.263607	0.28219	0.295905	0.241941	0.205505	0.27163	0.314853	0.283854	0.214939	0.274464	0.220664	0.234924	0.199222	0.227864	0.235212	0.216394	0.21417	0.202428	0.198839	0.20866	0.207975	0.213161	0.237414	0.216462	0.232225	0.241278	0.278319	0.265311	0.274985
Panisus_michaeli	0.312122	0.24779	0.444043	0.407125	0.444388	0.39849	0.456248	0.423122	0.437927	0.447873	0.479926	0.420338	0.44061	0.461486	0.445962	0.42385	0.458886	0.276339	0.23921	0.272495	0.374468	0.338577	0.336509	0.318733	0.312494	0.319478	0.31673	0.358967	0.248387	0.268554	0.280661	0.282665	0.243083	0.253245	0.244616	0.269097	0.261035	0.25671	0.237248	0.249918	0.250225	0.268979	0.274521	0.291526	0.255793	0.297914	0.324715	0.270006	0.280764
Parabrachypoda_montii	0.306531	0.29993	0.444295	0.462437	0.464261	0.440521	0.435243	0.469137	0.459698	0.455806	0.497982	0.483397	0.432757	0.478034	0.452726	0.42054	0.466561	0.261292	0.302562	0.31882	0.353888	0.279522	0.303028	0.284725	0.258023	0.293783	0.31426	0.311271	0.257867	0.281595	0.300291	0.261847	0.284076	0.288254	0.274976	0.287216	0.27416	0.265053	0.291426	0.291512	0.289316	0.284514	0.275444	0.295265	0.290974	0.325541	0.298661	0.29792	0.286226
Partnunia_naprintua	0.285742	0.217588	0.438355	0.397856	0.416675	0.400164	0.417917	0.411528	0.436168	0.42838	0.459528	0.38821	0.418796	0.4545	0.397301	0.384263	0.40652	0.205201	0.233079	0.233392	0.325516	0.286194	0.278391	0.267123	0.256936	0.27011	0.312495	0.255561	0.187696	0.226399	0.191648	0.209049	0.161468	0.171019	0.176769	0.187545	0.219149	0.200067	0.184102	0.158559	0.162507	0.172673	0.175228	0.179569	0.173079	0.251545	0.283673	0.218751	0.242939
Piona_damkoehleri	0.303016	0.286614	0.456104	0.425685	0.450431	0.459755	0.424025	0.451198	0.413581	0.412118	0.460823	0.435497	0.417307	0.46645	0.4084	0.421843	0.445194	0.22603	0.252488	0.259539	0.29636	0.263705	0.264813	0.237981	0.247801	0.271469	0.269264	0.262443	0.235061	0.260908	0.240203	0.244068	0.242686	0.23412	0.242847	0.214234	0.262545	0.261052	0.24197	0.247008	0.247762	0.251773	0.240495	0.231038	0.238259	0.258136	0.314273	0.261321	0.295322
Piona_disparilis	0.266966	0.287439	0.457858	0.420798	0.417167	0.459291	0.428351	0.440065	0.422129	0.445526	0.479406	0.416488	0.413525	0.471595	0.432969	0.409633	0.428819	0.192587	0.257227	0.281885	0.310131	0.297614	0.293051	0.250882	0.255999	0.23253	0.304734	0.291649	0.226818	0.255571	0.252293	0.258007	0.247509	0.221644	0.23854	0.233821	0.243539	0.237772	0.228139	0.213675	0.214392	0.236598	0.236826	0.246468	0.241447	0.266897	0.298259	0.281535	0.315136
Piona_laminata	0.291753	0.285802	0.445968	0.405958	0.433634	0.468703	0.446758	0.484155	0.439906	0.45202	0.485157	0.417406	0.411052	0.467651	0.421139	0.396767	0.434992	0.249105	0.243135	0.242141	0.286456	0.283882	0.299627	0.302945	0.302945	0.308333	0.294697	0.294034	0.24478	0.272199	0.239157	0.277447	0.217312	0.239554	0.249326	0.235382	0.254802	0.245596	0.241715	0.252377	0.24113	0.244673	0.225255	0.243216	0.242529	0.259069	0.329978	0.242797	0.277409
Protzia_halberti	0.298982	0.226355	0.427127	0.391996	0.419032	0.410212	0.441864	0.389154	0.453423	0.457061	0.455154	0.413096	0.419542	0.423294	0.400637	0.39193	0.440904	0.223263	0.241912	0.228276	0.300192	0.26352	0.305983	0.272784	0.261498	0.263636	0.286322	0.245429	0.217091	0.232346	0.209781	0.215465	0.213722	0.200757	0.212944	0.220299	0.229507	0.227015	0.201042	0.190221	0.193156	0.203193	0.197074	0.205649	0.201152	0.257881	0.274593	0.22897	0.248575
Protzia_invalvaris	0.303253	0.273432	0.431593	0.406368	0.420935	0.428563	0.430737	0.468705	0.45062	0.434256	0.448012	0.418333	0.418214	0.448716	0.415512	0.380552	0.434118	0.226124	0.250744	0.221366	0.281155	0.260128	0.266715	0.249776	0.259896	0.257464	0.28771	0.248454	0.220417	0.258028	0.227761	0.223192	0.19744	0.199211	0.231736	0.21035	0.211498	0.209052	0.220051	0.202629	0.19965	0.229439	0.215287	0.224193	0.206808	0.28202	0.320879	0.273063	0.286101
Protzia_octopora	0.262027	0.220195	0.420008	0.404033	0.392662	0.40049	0.410777	0.456981	0.385899	0.416477	0.398031	0.379668	0.404943	0.43707	0.406784	0.330013	0.412401	0.213057	0.252666	0.263216	0.299341	0.282804	0.298776	0.263186	0.236013	0.289532	0.29975	0.267664	0.215033	0.229022	0.222225	0.211496	0.215954	0.203824	0.200327	0.210067	0.208526	0.193288	0.193997	0.201955	0.201646	0.217432	0.215103	0.21251	0.211768	0.233218	0.313858	0.249069	0.2445
Protzia_rotunda	0.301626	0.242785	0.407221	0.38356	0.439817	0.391075	0.424433	0.435498	0.396005	0.419651	0.43813	0.403614	0.392032	0.44177	0.396857	0.383417	0.41746	0.236688	0.24736	0.243644	0.284823	0.278685	0.271557	0.253506	0.250847	0.261449	0.256068	0.263043	0.223163	0.254169	0.212781	0.213152	0.194045	0.206989	0.214941	0.209248	0.199222	0.19164	0.197454	0.2181	0.202325	0.204933	0.207585	0.210602	0.209154	0.240669	0.295354	0.255803	0.263214
Protzia_rugosa	0.301525	0.222723	0.449712	0.396279	0.421219	0.415107	0.449297	0.435044	0.394832	0.391446	0.437692	0.395757	0.3981	0.452026	0.419613	0.361129	0.457575	0.213604	0.235266	0.243307	0.271874	0.26638	0.26613	0.233795	0.240528	0.259614	0.303429	0.255202	0.204216	0.205057	0.185322	0.209381	0.166672	0.198342	0.189287	0.182521	0.215431	0.19212	0.182617	0.180001	0.181728	0.1864	0.207067	0.180555	0.198435	0.261723	0.253078	0.227856	0.247183
Protzia_squamosa	0.269529	0.262746	0.448248	0.409605	0.455526	0.405822	0.453374	0.423571	0.445798	0.438057	0.440787	0.425186	0.423209	0.47201	0.412276	0.40153	0.453374	0.241221	0.246843	0.235217	0.304448	0.312784	0.277521	0.289991	0.279864	0.277212	0.303977	0.283971	0.236584	0.270857	0.222333	0.269233	0.197219	0.21439	0.219322	0.221547	0.24425	0.236325	0.21631	0.229641	0.220874	0.227396	0.211893	0.206857	0.216621	0.288006	0.312031	0.27368	0.229743
Pseudotorrenticola_rhynchota	0.283805	0.255695	0.449324	0.422669	0.430133	0.405526	0.433221	0.430589	0.419504	0.475436	0.450931	0.44701	0.445419	0.451904	0.44621	0.39107	0.448648	0.234586	0.26611	0.267331	0.295209	0.302966	0.29056	0.29861	0.276756	0.280178	0.334536	0.277303	0.219653	0.254923	0.226554	0.25739	0.217135	0.211386	0.230571	0.221428	0.233701	0.224514	0.224946	0.221886	0.213227	0.230182	0.223806	0.211684	0.217388	0.257164	0.319822	0.28048	0.242881
Sperchon_brevirostris_BIN:AED3857	0.321646	0.271144	0.41835	0.421219	0.450843	0.422573	0.477442	0.447313	0.455341	0.462472	0.413859	0.44825	0.457624	0.447324	0.438124	0.42069	0.446888	0.237927	0.284283	0.232203	0.328995	0.283019	0.285798	0.270344	0.248028	0.29345	0.326925	0.252054	0.232783	0.219156	0.205809	0.20117	0.212948	0.223291	0.251348	0.219976	0.221185	0.227123	0.238746	0.216335	0.208876	0.219113	0.201941	0.222043	0.215391	0.273111	0.325158	0.244979	0.237162
Sperchon_brevirostris_BIN:ACP6107	0.310238	0.286868	0.429213	0.425471	0.44589	0.435692	0.480353	0.44652	0.471576	0.481697	0.415546	0.453463	0.465531	0.43398	0.424602	0.423007	0.461293	0.223284	0.276985	0.235799	0.308743	0.287674	0.276985	0.280319	0.257802	0.273264	0.32813	0.255447	0.227814	0.23422	0.210134	0.195462	0.209653	0.200559	0.231191	0.209243	0.210248	0.204598	0.234241	0.219108	0.200792	0.224749	0.21004	0.208549	0.19849	0.272933	0.333049	0.256647	0.243028
Sperchon_clupeifer_BIN:ACS1100	0.300745	0.234067	0.425399	0.394691	0.390381	0.445545	0.423715	0.417296	0.439482	0.421574	0.413595	0.391582	0.420228	0.448162	0.402297	0.397687	0.447685	0.188378	0.28641	0.27085	0.294515	0.276321	0.268686	0.27183	0.267302	0.266578	0.297251	0.303311	0.214464	0.206194	0.210787	0.213287	0.199146	0.224673	0.217972	0.226195	0.182702	0.167193	0.18741	0.189257	0.202401	0.197417	0.200968	0.210374	0.231855	0.250754	0.289348	0.256647	0.257966
Sperchon_clupeifer_BIN:AEE4061	0.318749	0.274024	0.464504	0.428585	0.424527	0.464392	0.435497	0.463805	0.470683	0.434353	0.441244	0.407644	0.444229	0.479075	0.416462	0.430583	0.453335	0.205901	0.324982	0.302338	0.331126	0.304089	0.305578	0.291817	0.294059	0.277855	0.325925	0.320212	0.26108	0.252334	0.239413	0.236724	0.25485	0.257591	0.24532	0.265448	0.209463	0.199927	0.222107	0.2283	0.235919	0.224073	0.243066	0.257387	0.266513	0.274755	0.330767	0.293	0.303811
Sperchon_denticulatus	0.279891	0.251548	0.434516	0.411766	0.401583	0.458067	0.435932	0.422625	0.417194	0.434273	0.436034	0.386035	0.397096	0.432702	0.406004	0.385698	0.454282	0.216259	0.25266	0.243434	0.297876	0.280078	0.286987	0.271054	0.285325	0.285919	0.277199	0.292835	0.195513	0.229779	0.188475	0.197848	0.177651	0.204354	0.201244	0.196446	0.225599	0.206458	0.180291	0.192936	0.189676	0.198796	0.204183	0.197527	0.209735	0.25316	0.288188	0.251461	0.259353
Sperchon_hibernicus	0.299097	0.253007	0.4535	0.3906	0.404309	0.45937	0.447726	0.434641	0.417771	0.453633	0.465207	0.371664	0.420283	0.458399	0.428109	0.379112	0.439425	0.218675	0.255205	0.265569	0.302095	0.297513	0.286669	0.283457	0.282799	0.298912	0.319872	0.303069	0.206078	0.219778	0.216727	0.244035	0.209009	0.220649	0.215369	0.21161	0.240451	0.230103	0.199438	0.203329	0.202239	0.212134	0.190754	0.200287	0.223065	0.263349	0.321422	0.26109	0.237694
Sperchon_hispidus	0.266137	0.223677	0.429227	0.401187	0.418499	0.41235	0.394036	0.387368	0.421872	0.439691	0.412673	0.362406	0.382597	0.423218	0.401918	0.380822	0.420479	0.200878	0.274202	0.288309	0.296021	0.291997	0.298239	0.294447	0.27796	0.290575	0.334223	0.262314	0.188777	0.205246	0.197479	0.189709	0.176565	0.198347	0.176133	0.192534	0.189663	0.174968	0.180363	0.18446	0.190811	0.2024	0.22212	0.207606	0.20022	0.251215	0.291882	0.248897	0.26817
Sperchon_papillosus	0.274405	0.242661	0.448815	0.3901	0.388753	0.436624	0.392605	0.457185	0.410787	0.422535	0.401506	0.392929	0.38458	0.462964	0.398404	0.393358	0.421454	0.17922	0.265402	0.245768	0.275763	0.243356	0.285397	0.245734	0.267014	0.274703	0.295036	0.273485	0.199485	0.198492	0.182653	0.187852	0.167726	0.187939	0.200965	0.215319	0.183752	0.164595	0.191785	0.172873	0.173324	0.194549	0.197344	0.199202	0.185455	0.268165	0.269527	0.230185	0.255511
Sperchon_thienemanni	0.269094	0.215883	0.448589	0.392338	0.41736	0.429915	0.422237	0.442417	0.417845	0.458794	0.425804	0.388964	0.388868	0.448592	0.406748	0.379607	0.417222	0.222267	0.218849	0.226101	0.312324	0.274023	0.285449	0.27666	0.269651	0.299212	0.298792	0.234315	0.196569	0.243779	0.198693	0.212166	0.196472	0.202565	0.183529	0.208584	0.217595	0.20551	0.214838	0.188837	0.188388	0.213268	0.229636	0.199849	0.206588	0.280153	0.268285	0.223666	0.235148
Sperchon_violaceus	0.309794	0.263868	0.447332	0.405291	0.379876	0.432729	0.444978	0.40031	0.451975	0.460591	0.439076	0.374574	0.390112	0.445722	0.414303	0.380816	0.459733	0.192027	0.258382	0.261035	0.306526	0.273891	0.274226	0.252054	0.259495	0.257132	0.312231	0.315097	0.219227	0.244192	0.236803	0.228711	0.22747	0.223899	0.195903	0.216751	0.228969	0.217646	0.204376	0.202379	0.194035	0.23111	0.210094	0.230346	0.225167	0.229385	0.305185	0.248653	0.2579
Sperchonopsis_verrucosa_BIN:ACS9705	0.271652	0.235815	0.430162	0.419609	0.438956	0.447721	0.407854	0.425858	0.404503	0.414808	0.421444	0.380853	0.404987	0.440766	0.419364	0.391898	0.40536	0.203005	0.223137	0.253748	0.315202	0.30568	0.312789	0.253651	0.262491	0.296576	0.29861	0.281345	0.191104	0.21136	0.192453	0.198663	0.183802	0.18691	0.20786	0.200982	0.194678	0.18712	0.172751	0.189145	0.194217	0.192505	0.214144	0.200134	0.194617	0.248332	0.313901	0.247566	0.256601
Sperchonopsis_verrucosa_BIN:AEK8297	0.28419	0.253248	0.460682	0.399926	0.431693	0.413853	0.388919	0.418586	0.416416	0.427653	0.433092	0.417097	0.403179	0.477926	0.399487	0.365025	0.412883	0.200668	0.253601	0.256058	0.303744	0.30095	0.31056	0.272039	0.276833	0.305351	0.313692	0.293849	0.183814	0.233671	0.196133	0.189882	0.160601	0.21429	0.214514	0.209089	0.199061	0.202764	0.187161	0.197122	0.184802	0.178778	0.206832	0.208665	0.217183	0.237777	0.306766	0.266648	0.26752
Teutonia_cometes	0.313129	0.258489	0.454286	0.412098	0.463012	0.438371	0.419187	0.436498	0.411387	0.455065	0.438677	0.377762	0.405279	0.468608	0.410485	0.397397	0.422536	0.244054	0.308604	0.303097	0.345746	0.309223	0.334947	0.29538	0.254066	0.274696	0.265156	0.311465	0.239738	0.272038	0.241124	0.269349	0.251436	0.255692	0.223427	0.255566	0.264153	0.242202	0.238399	0.27577	0.275022	0.262462	0.250529	0.248636	0.25612	0.255268	0.285364	0.301609	0.305235
Tiphyis_ornatus	0.341022	0.307218	0.481577	0.430806	0.475022	0.464228	0.481791	0.474904	0.45116	0.476079	0.462562	0.430739	0.445783	0.504681	0.414092	0.421994	0.455654	0.246161	0.280344	0.273661	0.321021	0.297523	0.296928	0.275307	0.270778	0.317324	0.292947	0.286908	0.27755	0.269041	0.268898	0.308537	0.264413	0.253542	0.300083	0.263758	0.278717	0.288672	0.290624	0.25553	0.255478	0.297141	0.255567	0.25726	0.26535	0.323418	0.336135	0.263443	0.284039
Tiphys_torris	0.314278	0.288205	0.4353	0.408581	0.422248	0.437236	0.435276	0.458073	0.419012	0.432961	0.455334	0.417149	0.408455	0.462837	0.416398	0.39041	0.435491	0.199644	0.284692	0.275669	0.281046	0.285011	0.302667	0.243617	0.238747	0.286058	0.269646	0.255102	0.234358	0.264341	0.23309	0.243407	0.229101	0.231634	0.251337	0.23525	0.260501	0.251166	0.238743	0.2185	0.225913	0.244481	0.233475	0.246429	0.241751	0.265606	0.289837	0.247168	0.305028
Torrenticola_amplexa	0.281582	0.240215	0.449705	0.38311	0.396571	0.432626	0.45816	0.452984	0.392693	0.398161	0.414286	0.389212	0.398547	0.462423	0.377773	0.37208	0.460746	0.192717	0.262222	0.272993	0.291868	0.277385	0.316991	0.261686	0.265049	0.25744	0.30355	0.275681	0.194951	0.203364	0.195118	0.204627	0.183967	0.173045	0.16046	0.194926	0.191337	0.179495	0.183794	0.162926	0.163838	0.175288	0.180101	0.180475	0.176657	0.235691	0.283079	0.242959	0.247421
Torrenticola_barsica	0.284308	0.230592	0.417533	0.437394	0.43776	0.406615	0.423474	0.417601	0.380542	0.405018	0.413177	0.390142	0.414773	0.435648	0.421038	0.387466	0.429783	0.220625	0.25847	0.267772	0.324962	0.296129	0.312085	0.271486	0.266952	0.299695	0.32482	0.312049	0.231224	0.240412	0.226262	0.225808	0.198495	0.230509	0.209177	0.210179	0.231823	0.215946	0.197391	0.203335	0.201644	0.226576	0.204139	0.21579	0.232345	0.279311	0.304136	0.26764	0.255859
Torrenticola_brevirostris	0.284438	0.224062	0.433994	0.404472	0.409609	0.41843	0.445351	0.431139	0.385826	0.426788	0.423249	0.383665	0.402688	0.446427	0.390826	0.404884	0.437942	0.218063	0.266684	0.260549	0.286782	0.294454	0.310951	0.273296	0.251653	0.297855	0.31749	0.299744	0.16829	0.222608	0.192775	0.221206	0.176043	0.192272	0.196097	0.159105	0.200143	0.191057	0.183549	0.18147	0.188275	0.218242	0.192388	0.193876	0.191225	0.239568	0.294275	0.228662	0.257083
Torrenticola_dudichi	0.312184	0.248034	0.436569	0.400458	0.39662	0.401161	0.456273	0.410248	0.393597	0.424403	0.438742	0.390593	0.415194	0.446719	0.420478	0.379958	0.456275	0.226148	0.244186	0.282342	0.303838	0.287952	0.293394	0.298099	0.255265	0.270939	0.338115	0.293979	0.194719	0.221252	0.219185	0.213366	0.20357	0.210522	0.226857	0.183867	0.217896	0.201119	0.204134	0.202272	0.197194	0.205501	0.210482	0.206769	0.215295	0.256712	0.279842	0.251658	0.27148
Torrenticola_elliptica	0.309097	0.240735	0.428284	0.388408	0.405537	0.4164	0.431368	0.41503	0.42943	0.425399	0.408133	0.406466	0.410052	0.454014	0.426303	0.369796	0.426447	0.206183	0.277449	0.25934	0.297402	0.270304	0.300222	0.272607	0.267681	0.274439	0.306029	0.284182	0.215033	0.238852	0.218576	0.206035	0.187811	0.193833	0.226017	0.202758	0.216798	0.202279	0.206739	0.193522	0.194095	0.221149	0.206047	0.225198	0.198379	0.266557	0.286186	0.24454	0.255843
Torrenticola_laskai_BIN:AED2306	0.281366	0.232212	0.387645	0.373768	0.419413	0.423486	0.427356	0.421143	0.391668	0.394416	0.427585	0.371575	0.397831	0.404702	0.38597	0.365939	0.44791	0.22199	0.240624	0.238474	0.306588	0.279352	0.290348	0.253352	0.241559	0.251656	0.313769	0.272878	0.170407	0.205498	0.202866	0.197745	0.191857	0.20033	0.201647	0.174445	0.208102	0.191615	0.187216	0.195405	0.189997	0.202088	0.195037	0.189	0.203086	0.239886	0.285974	0.230676	0.23444
Torrenticola_laskai_BIN:AEF5471	0.27653	0.227863	0.39682	0.380229	0.413984	0.420274	0.424457	0.42439	0.402505	0.394416	0.424348	0.380836	0.399094	0.410638	0.395052	0.385502	0.441896	0.233985	0.258142	0.254494	0.30679	0.284352	0.299764	0.25575	0.241559	0.258601	0.313101	0.271375	0.174261	0.22849	0.198673	0.207949	0.187642	0.20478	0.211897	0.187582	0.209197	0.193754	0.19068	0.200591	0.189915	0.208166	0.214776	0.194332	0.211314	0.248537	0.296133	0.235211	0.236301
Torrenticola_lukai	0.293505	0.229672	0.442993	0.403264	0.426539	0.430332	0.451187	0.458986	0.41208	0.431068	0.427585	0.422625	0.440485	0.451542	0.417972	0.394379	0.460599	0.223451	0.271054	0.300967	0.295957	0.295154	0.27069	0.276215	0.268352	0.27971	0.336498	0.287381	0.193045	0.217296	0.206957	0.186106	0.19058	0.212264	0.209457	0.183168	0.230962	0.207193	0.220936	0.199275	0.185822	0.168469	0.196648	0.181591	0.212997	0.234047	0.308107	0.269895	0.259079
Torrenticola_meridionalis_BIN:AEI3402	0.269252	0.23694	0.441829	0.405793	0.429554	0.403031	0.413071	0.432269	0.435258	0.404594	0.407082	0.414913	0.40917	0.456484	0.41106	0.375679	0.423034	0.213639	0.276871	0.260979	0.303172	0.269921	0.308426	0.288818	0.259688	0.263809	0.316151	0.271909	0.221143	0.225256	0.198506	0.200341	0.192249	0.197156	0.233341	0.203896	0.219882	0.208993	0.198477	0.203824	0.203059	0.204921	0.21346	0.207174	0.197221	0.249547	0.27426	0.266215	0.243873
Torrenticola_similis	0.288296	0.247982	0.422142	0.439081	0.425532	0.457539	0.41889	0.437592	0.426285	0.420484	0.476098	0.380898	0.411847	0.430127	0.422088	0.360274	0.446169	0.231558	0.249915	0.262641	0.297651	0.288396	0.299229	0.256107	0.26095	0.273601	0.315784	0.286822	0.209667	0.211479	0.219174	0.21788	0.183662	0.195925	0.208321	0.226276	0.220775	0.20369	0.193062	0.204802	0.201289	0.197327	0.224268	0.21025	0.195542	0.263677	0.295253	0.257261	0.264281
Torrenticola_ungeri	0.293237	0.221852	0.461395	0.372942	0.455859	0.385312	0.418639	0.425474	0.40332	0.390183	0.408133	0.405859	0.408542	0.475161	0.395191	0.356562	0.427026	0.221895	0.269847	0.271349	0.314665	0.280235	0.295835	0.285489	0.246139	0.271362	0.302297	0.272892	0.18022	0.231261	0.192149	0.203802	0.193204	0.187817	0.186464	0.193345	0.234003	0.216086	0.20037	0.17679	0.178346	0.181628	0.192507	0.200816	0.191959	0.237419	0.246279	0.230449	0.23814
Torrenticola_meridionalis_BIN:AED7519	0.275599	0.248591	0.43767	0.412431	0.425094	0.397459	0.416785	0.4376	0.423945	0.419442	0.418956	0.410336	0.418226	0.450047	0.404448	0.361075	0.425702	0.208725	0.280574	0.262075	0.306907	0.265691	0.309471	0.276976	0.254194	0.272684	0.335579	0.279337	0.215378	0.21148	0.204573	0.215681	0.189269	0.204679	0.225516	0.204325	0.231831	0.214994	0.203125	0.210879	0.209227	0.211003	0.221621	0.232174	0.203562	0.27217	0.295916	0.264549	0.245928
Trichothyas_jadrankae	0.347763	0.321143	0.498019	0.418639	0.437581	0.46155	0.450757	0.488273	0.495855	0.468924	0.450098	0.400107	0.416566	0.517682	0.461998	0.434481	0.438824	0.263046	0.312842	0.277257	0.328963	0.283472	0.326347	0.319607	0.291034	0.308867	0.312894	0.312353	0.287387	0.308396	0.267119	0.30138	0.303635	0.294646	0.285798	0.312984	0.298649	0.27801	0.282079	0.255829	0.257362	0.292367	0.262145	0.306394	0.302476	0.327595	0.307227	0.296469	0.321013
Unionicola_minor_BIN:AAU0335	0.299758	0.3012	0.448371	0.441393	0.445197	0.419785	0.449552	0.440598	0.422047	0.471342	0.442889	0.409807	0.434628	0.476542	0.448284	0.390285	0.450214	0.268313	0.273446	0.264905	0.316365	0.284207	0.2953	0.276006	0.286159	0.314147	0.313062	0.278574	0.268865	0.25396	0.27444	0.279896	0.265561	0.26154	0.294796	0.272262	0.296376	0.291987	0.266203	0.277652	0.281868	0.288514	0.250376	0.298622	0.263778	0.319102	0.36128	0.273464	0.283375
Unionicola_minor_BIN:AEF4865	0.288892	0.300599	0.478437	0.466001	0.429199	0.439315	0.439493	0.484317	0.479708	0.482827	0.489655	0.416176	0.412148	0.496751	0.436638	0.404337	0.451638	0.2434	0.271317	0.240099	0.289301	0.278454	0.288065	0.277715	0.248131	0.317617	0.298436	0.272715	0.261859	0.274699	0.24262	0.25583	0.24789	0.250761	0.265903	0.28137	0.258266	0.242378	0.273332	0.255654	0.259603	0.252698	0.233479	0.270503	0.255762	0.312465	0.303152	0.28382	0.317648
Unionicola_ypsilophora	0.34913	0.323425	0.438236	0.407452	0.435645	0.42381	0.450499	0.479968	0.417146	0.454968	0.497247	0.449004	0.463438	0.454832	0.448954	0.434251	0.444429	0.282209	0.279748	0.286851	0.352816	0.328426	0.290142	0.299545	0.315933	0.305764	0.31736	0.290515	0.285215	0.287034	0.317381	0.301929	0.271708	0.297471	0.30556	0.296495	0.278474	0.280088	0.269041	0.277853	0.292536	0.322138	0.293884	0.304842	0.309215	0.315791	0.356571	0.29593	0.302198
Wettina_lacustris	0.303044	0.341671	0.511808	0.510463	0.462876	0.498259	0.518432	0.481832	0.532155	0.521374	0.509676	0.496025	0.500626	0.556259	0.508021	0.463475	0.521845	0.320196	0.303901	0.300234	0.331857	0.312351	0.317796	0.276049	0.270101	0.30206	0.340446	0.331962	0.324111	0.339218	0.324203	0.319878	0.288867	0.297895	0.307241	0.29875	0.301781	0.31032	0.311317	0.313862	0.319609	0.349936	0.318952	0.324517	0.297503	0.343795	0.361811	0.334717	0.288435
Woolastookia_rotundifrons	0.278126	0.262281	0.422582	0.404244	0.43328	0.46586	0.438968	0.469086	0.440856	0.430145	0.431217	0.436962	0.441715	0.416107	0.462668	0.427583	0.448238	0.213295	0.282693	0.303118	0.325829	0.281542	0.286219	0.258406	0.246994	0.26907	0.291536	0.275579	0.262239	0.264764	0.262256	0.254083	0.243272	0.218239	0.242259	0.223983	0.251443	0.241014	0.23782	0.237961	0.244593	0.250698	0.257044	0.243811	0.219278	0.241	0.334108	0.262797	0.265367
[truncated: 53 more columns]

## Sheet: Caption
Table. Estimates of Evolutionary Divergence over Sequence Pairs between Groups
The number of base substitutions per site from averaging over all sequence pairs between groups are shown. Analyses were conducted using the Kimura 2-parameter model [1]. This analysis involved 232 nucleotide sequences. Codon positions included were 1st+2nd+3rd+Noncoding. All ambiguous positions were removed for each sequence pair (pairwise deletion option). There were a total of 680 positions in…
1. Kimura M. (1980). A simple method for estimating evolutionary rate of base substitutions through comparative studies of nucleotide sequences. Journal of Molecular Evolution 16:111-120.
2. Kumar S., Stecher G., Li M., Knyaz C., and Tamura K. (2018). MEGA X: Molecular Evolutionary Genetics Analysis across computing platforms. Molecular Biology and Evolution 35:1547-1549.
Disclaimer: Although utmost care has been taken to ensure the correctness of the caption, the caption text is provided "as is" without any warranty of any kind. Authors advise the user to carefully check the caption prior to its use for any purpose and report any errors or problems to the authors immediately (www.megasoftware.net). In no event shall the authors and their employers be liable for a…
